# Supplementary material for: Global predictions for the risk of establishment of Pierce’s disease of grapevines
Source: PubMed Central journal article supplement (PMC9768138; doi:10.1038/s42003-022-04358-w), 2022-12-20
Supplement: 42003_2022_4358_MOESM3_ESM.pdf [file 42003_2022_4358_MOESM3_ESM.pdf]

## Description of Additional Supplementary Files

**Supplementary Data 1**- Results of the inoculation assays on European grapevine varieties with two isolates of *Xylella fastidiosa* subsp. *fastidiosa* (ST1) carried out in Mallorca between 2018 and 2020.

**Supplementary Data 2**- Distribution of Pierce's disease in the United States. Data was obtained from different publications in which at least information of the county was provided.

**Supplementary Data 3**- Pierce's disease risk of establishment in winegrowing regions of China and the Southern Hemisphere.

**Supplementary Data 4**- Pierce's disease risk areas in European vineyards given by the intersection of Corine-Land-Cover and the projected model in the ERA5-land data under a  $R_0=5$  scenario and a spatial heterogeneous vector distribution for 2019 and projection for 2050.
